# Supplementary material
Source: PubMed Central journal article supplement (PMC4795029)
Supplement: rspb20152588supp1.pdf [file rspb20152588supp1.pdf]

## Electronic Supplementary Material

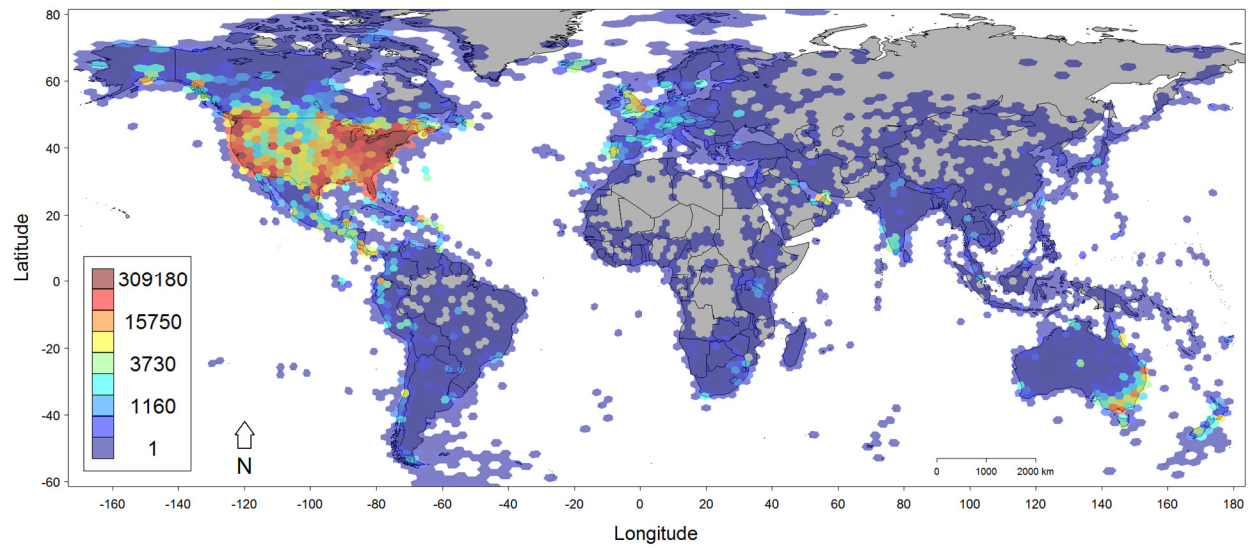

**Figure S1.** The global distribution of eBird checklists compiled within equal-area hexagon cells (49,811 km<sup>2</sup>) of a global icosahedron from 2002 to 2014.

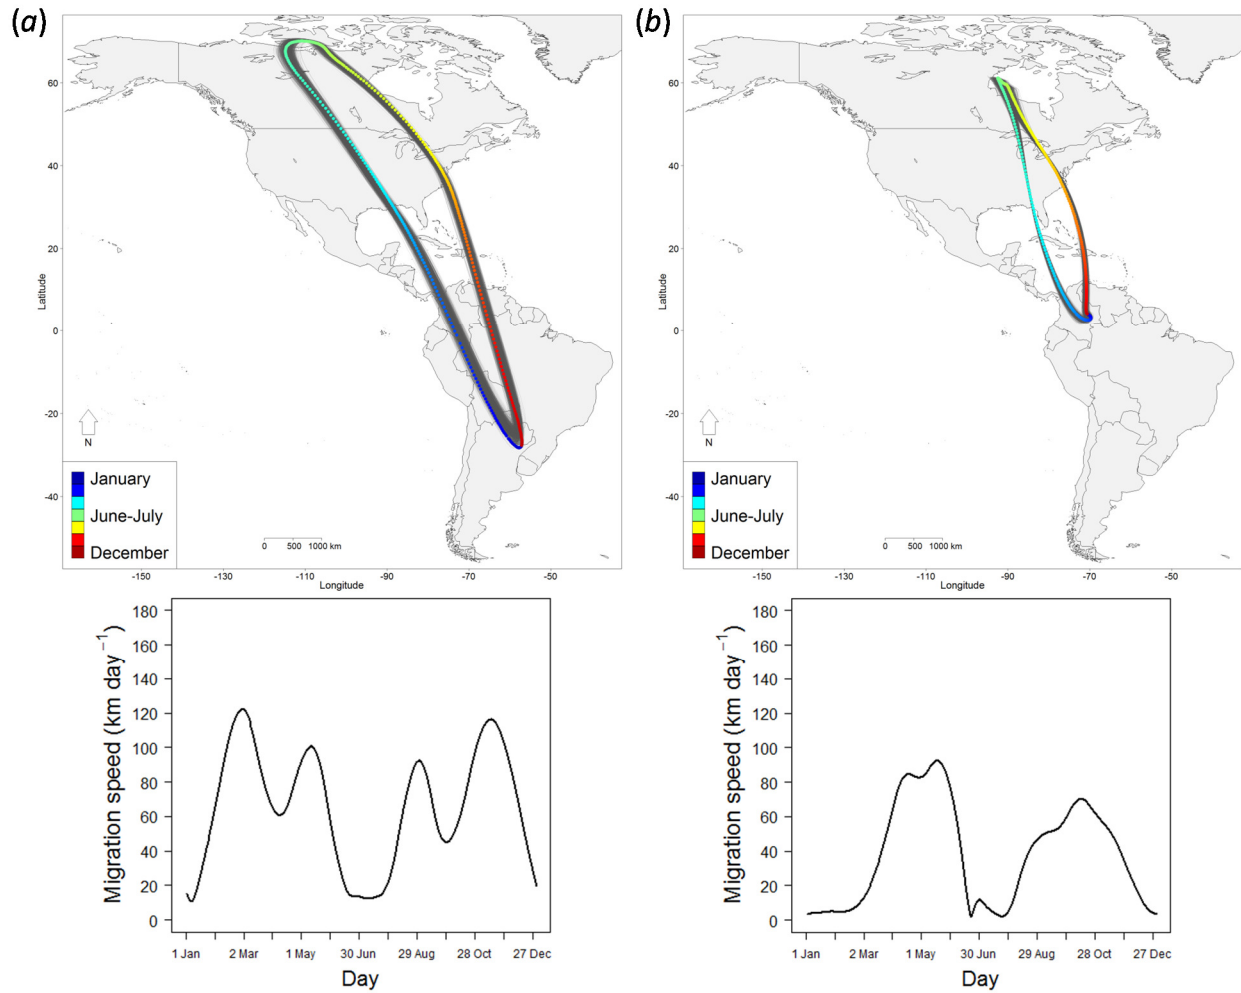

**Figure S2.** Examples of population-level migration trajectories estimated daily across the annual cycle for the combined period 2002-2014 for the (a) American Golden Plover (*Pluvialis dominica*) and the (b) Blackpoll Warbler (*Setophaga striata*). The black trajectory lines are from 1000 bootstrap replicates. The plots below each map are population-level estimates of daily migration speed across the annual cycle for the combined period 2002-2014.

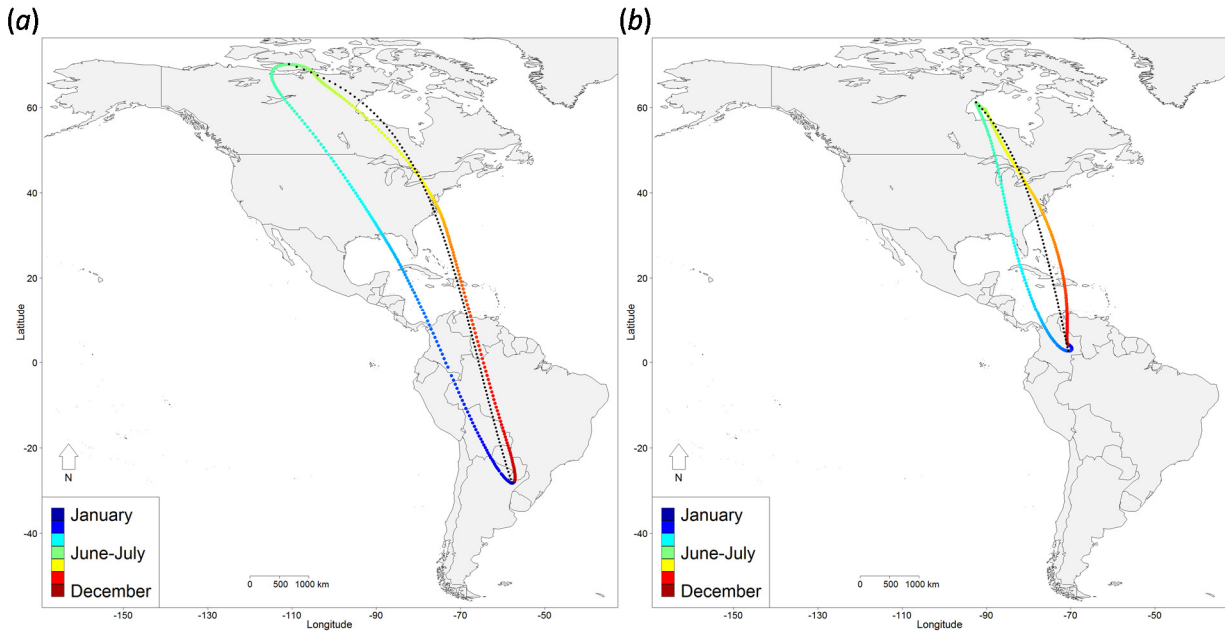

**Figure S3.** Examples of population-level migration trajectories estimated daily across the annual cycle for the combined period 2002-2014 for the (a) American Golden Plover (*Pluvialis dominica*) and the (b) Blackpoll Warbler (*Setophaga striata*). The dotted black trajectory lines are the great circle (orthodromic) paths between the daily centroids having the minimum and maximum latitudes.

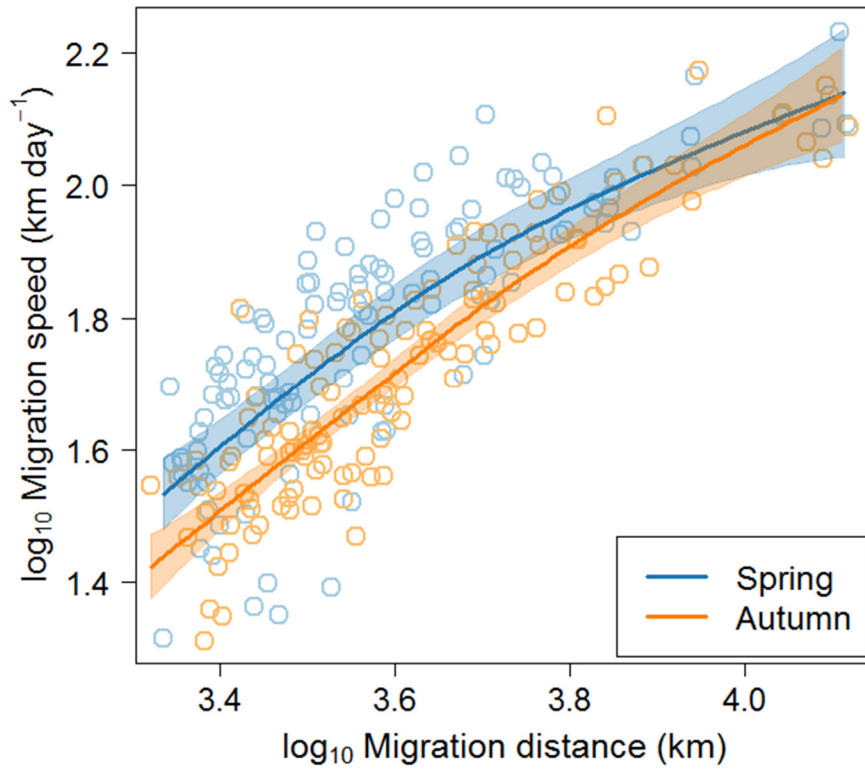

**Figure S4.** The relationship between migration distance and peak migration speed for 118 migratory bird species estimated at the population-level during spring and autumn migration within the Western Hemisphere. The fitted lines and 95% confidence bands are from generalized additive mixed models with family as a random effect.
