# Supplementary material
Source: PubMed Central journal article supplement (PMC4795029)
Supplement: rspb20152588supp2.pdf [file rspb20152588supp2.pdf]

## Electronic Supplementary Material

**Table S1.** The 118 long-distance migratory bird species considered in the analysis and if they followed a clockwise (CW), counterclockwise (CCW), or intersecting (INT) migration trajectory and if the trajectory was transoceanic (Ocean).

| Common                         | Scientific                             | Family        | Class | Ocean |
|--------------------------------|----------------------------------------|---------------|-------|-------|
| Acadian Flycatcher             | <i>Empidonax virescens</i>             | Tyrannidae    | CW    | X     |
| Alder Flycatcher               | <i>Empidonax alnorum</i>               | Tyrannidae    | CCW   | X     |
| American Golden-Plover         | <i>Pluvialis dominica</i>              | Charadriidae  | CW    | X     |
| American Redstart              | <i>Setophaga ruticilla</i>             | Parulidae     | CW    | X     |
| Baird's Sandpiper              | <i>Calidris bairdii</i>                | Scolopacidae  | INT   | X     |
| Baird's Sparrow                | <i>Ammodramus bairdii</i>              | Emberizidae   | INT   |       |
| Baltimore Oriole               | <i>Icterus galbula</i>                 | Icteridae     | CCW   | X     |
| Bay-breasted Warbler           | <i>Setophaga castanea</i>              | Parulidae     | CW    | X     |
| Bicknell's Thrush              | <i>Catharus bicknelli</i>              | Turdidae      | INT   | X     |
| Black Turnstone                | <i>Arenaria melanocephala</i>          | Scolopacidae  | INT   |       |
| Black-and-white Warbler        | <i>Mniotilta varia</i>                 | Parulidae     | CW    | X     |
| Black-billed Cuckoo            | <i>Coccyzus erythrophthalmus</i>       | Cuculidae     | CW    | X     |
| Blackburnian Warbler           | <i>Setophaga fusca</i>                 | Parulidae     | CW    | X     |
| Black-headed Grosbeak          | <i>Pheucticus melanocephalus</i>       | Cardinalidae  | INT   |       |
| Blackpoll Warbler              | <i>Setophaga striata</i>               | Parulidae     | CW    | X     |
| Black-throated Blue Warbler    | <i>Setophaga caerulescens</i>          | Parulidae     | INT   | X     |
| Black-throated Green Warbler   | <i>Setophaga virens</i>                | Parulidae     | CW    | X     |
| Blue-headed Vireo              | <i>Vireo solitarius</i>                | Vireonidae    | INT   |       |
| Blue-winged Warbler            | <i>Vermivora cyanoptera</i>            | Parulidae     | CW    | X     |
| Bobolink                       | <i>Dolichonyx oryzivorus</i>           | Icteridae     | CW    | X     |
| Brown-chested Martin           | <i>Progne tapera</i>                   | Hirundinidae  | INT   |       |
| Brown-crested Flycatcher       | <i>Myiarchus tyrannulus</i>            | Tyrannidae    | INT   |       |
| Buff-breasted Sandpiper        | <i>Calidris subruficollis</i>          | Scolopacidae  | INT   | X     |
| Bullock's Oriole               | <i>Icterus bullockii</i>               | Icteridae     | CW    |       |
| Calliope Hummingbird           | <i>Selasphorus calliope</i>            | Trochilidae   | CW    |       |
| Canada Warbler                 | <i>Cardellina canadensis</i>           | Parulidae     | INT   | X     |
| Cape May Warbler               | <i>Setophaga tigrina</i>               | Parulidae     | CW    | X     |
| Cassin's Vireo                 | <i>Vireo cassinii</i>                  | Vireonidae    | CW    |       |
| Cerulean Warbler               | <i>Setophaga cerulea</i>               | Parulidae     | CW    | X     |
| Chestnut-collared Longspur     | <i>Calcarius ornatus</i>               | Calcariidae   | CCW   |       |
| Chestnut-sided Warbler         | <i>Setophaga pensylvanica</i>          | Parulidae     | CW    | X     |
| Chimney Swift                  | <i>Chaetura pelagica</i>               | Apodidae      | CW    | X     |
| Cinnamon-bellied Ground-Tyrant | <i>Muscisaxicola capistratus</i>       | Tyrannidae    | INT   |       |
| Clay-colored Sparrow           | <i>Spizella pallida</i>                | Emberizidae   | INT   |       |
| Common Nighthawk               | <i>Chordeiles minor</i>                | Caprimulgidae | INT   | X     |
| Connecticut Warbler            | <i>Oporornis agilis</i>                | Parulidae     | CW    | X     |
| Crowned Slaty Flycatcher       | <i>Empidonax aurantioatrocristatus</i> | Tyrannidae    | INT   |       |
| Dark-faced Ground-Tyrant       | <i>Muscisaxicola maclovianus</i>       | Tyrannidae    | INT   |       |
| Dusky Flycatcher               | <i>Empidonax oberholseri</i>           | Tyrannidae    | INT   |       |
| Eastern Kingbird               | <i>Tyrannus tyrannus</i>               | Tyrannidae    | INT   | X     |
| Eastern Wood-Pewee             | <i>Contopus virens</i>                 | Tyrannidae    | CW    | X     |
| Fork-tailed Flycatcher         | <i>Tyrannus savana</i>                 | Tyrannidae    | CW    |       |
| Golden-crowned Sparrow         | <i>Zonotrichia atricapilla</i>         | Emberizidae   | CCW   |       |
| Golden-winged Warbler          | <i>Vermivora chrysoptera</i>           | Parulidae     | CW    | X     |
| Gray-cheeked Thrush            | <i>Catharus minimus</i>                | Turdidae      | CW    | X     |
| Gray-crowned Rosy-Finch        | <i>Leucosticte tephrocotis</i>         | Fringillidae  | INT   |       |
| Great Crested Flycatcher       | <i>Myiarchus crinitus</i>              | Tyrannidae    | CCW   | X     |
| Hammond's Flycatcher           | <i>Empidonax hammondii</i>             | Tyrannidae    | INT   |       |
| Harris's Sparrow               | <i>Zonotrichia querula</i>             | Emberizidae   | INT   |       |
| Hermit Thrush                  | <i>Catharus guttatus</i>               | Turdidae      | CCW   |       |
| Hermit Warbler                 | <i>Setophaga occidentalis</i>          | Parulidae     | INT   |       |
| Indigo Bunting                 | <i>Passerina cyanea</i>                | Cardinalidae  | CW    | X     |

| <b>Common</b>              | <b>Scientific</b>                  | <b>Family</b> | <b>Class</b> | <b>Ocean</b> |
|----------------------------|------------------------------------|---------------|--------------|--------------|
| Kentucky Warbler           | <i>Geothlypis formosa</i>          | Parulidae     | INT          | X            |
| Lapland Longspur           | <i>Calcarius lapponicus</i>        | Calcariidae   | CW           |              |
| Lazuli Bunting             | <i>Passerina amoena</i>            | Cardinalidae  | INT          |              |
| Le Conte's Sparrow         | <i>Ammodramus leconteii</i>        | Emberizidae   | CW           |              |
| Least Flycatcher           | <i>Empidonax minimus</i>           | Tyrannidae    | INT          | X            |
| Least Seedsnipe            | <i>Thinocorus rumicivorus</i>      | Thinocoridae  | INT          |              |
| Louisiana Waterthrush      | <i>Parkesia motacilla</i>          | Parulidae     | INT          | X            |
| MacGillivray's Warbler     | <i>Geothlypis tolmiei</i>          | Parulidae     | INT          |              |
| Magnolia Warbler           | <i>Setophaga magnolia</i>          | Parulidae     | CW           | X            |
| Mourning Warbler           | <i>Geothlypis philadelphia</i>     | Parulidae     | INT          | X            |
| Nashville Warbler          | <i>Oreothlypis ruficapilla</i>     | Parulidae     | CW           |              |
| Nelson's Sparrow           | <i>Ammodramus nelsoni</i>          | Emberizidae   | CW           |              |
| Northern Parula            | <i>Setophaga americana</i>         | Parulidae     | CW           | X            |
| Northern Waterthrush       | <i>Parkesia noveboracensis</i>     | Parulidae     | CCW          | X            |
| Ochre-naped Ground-Tyrant  | <i>Muscisaxicola flavinucha</i>    | Tyrannidae    | INT          |              |
| Olive-sided Flycatcher     | <i>Contopus cooperi</i>            | Tyrannidae    | INT          | X            |
| Orange-crowned Warbler     | <i>Oreothlypis celata</i>          | Parulidae     | CW           |              |
| Orchard Oriole             | <i>Icterus spurius</i>             | Icteridae     | CCW          | X            |
| Ovenbird                   | <i>Seiurus aurocapilla</i>         | Parulidae     | CCW          | X            |
| Pacific-slope Flycatcher   | <i>Empidonax difficilis</i>        | Tyrannidae    | INT          |              |
| Palm Warbler               | <i>Setophaga palmarum</i>          | Parulidae     | CW           |              |
| Pectoral Sandpiper         | <i>Calidris melanotos</i>          | Scolopacidae  | CW           | X            |
| Philadelphia Vireo         | <i>Vireo philadelphicus</i>        | Vireonidae    | CW           | X            |
| Prothonotary Warbler       | <i>Protonotaria citrea</i>         | Parulidae     | CW           | X            |
| Purple Martin              | <i>Progne subis</i>                | Hirundinidae  | INT          | X            |
| Purple Sandpiper           | <i>Calidris maritima</i>           | Scolopacidae  | INT          |              |
| Red-eyed Vireo             | <i>Vireo olivaceus</i>             | Vireonidae    | CW           | X            |
| Rose-breasted Grosbeak     | <i>Pheucticus ludovicianus</i>     | Cardinalidae  | CW           | X            |
| Ruby-throated Hummingbird  | <i>Archilochus colubris</i>        | Trochilidae   | CCW          | X            |
| Rufous Hummingbird         | <i>Selasphorus rufus</i>           | Trochilidae   | CW           |              |
| Rusty Blackbird            | <i>Euphagus carolinus</i>          | Icteridae     | INT          |              |
| Scarlet Tanager            | <i>Piranga olivacea</i>            | Cardinalidae  | CW           | X            |
| Scissor-tailed Flycatcher  | <i>Tyrannus forficatus</i>         | Tyrannidae    | CW           | X            |
| Small-billed Elaenia       | <i>Small-billed Elaenia</i>        | Tyrannidae    | CW           |              |
| Smith's Longspur           | <i>Calcarius pictus</i>            | Calcariidae   | INT          |              |
| Solitary Sandpiper         | <i>Tringa solitaria</i>            | Scolopacidae  | CW           | X            |
| Southern Martin            | <i>Progne elegans</i>              | Hirundinidae  | INT          |              |
| Spot-billed Ground-Tyrant  | <i>Muscisaxicola maculirostris</i> | Tyrannidae    | INT          |              |
| Sprague's Pipit            | <i>Anthus spragueii</i>            | Motacillidae  | INT          |              |
| Sulphur-bellied Flycatcher | <i>Myiodynastes luteiventris</i>   | Tyrannidae    | INT          |              |
| Summer Tanager             | <i>Piranga rubra</i>               | Cardinalidae  | CW           | X            |
| Swainson's Thrush          | <i>Catharus ustulatus</i>          | Turdidae      | CW           | X            |
| Tennessee Warbler          | <i>Oreothlypis peregrina</i>       | Parulidae     | CW           | X            |
| Townsend's Warbler         | <i>Setophaga townsendi</i>         | Parulidae     | INT          |              |
| Veery                      | <i>Catharus fuscescens</i>         | Turdidae      | CW           | X            |
| Violet-green Swallow       | <i>Tachycineta thalassina</i>      | Hirundinidae  | INT          |              |
| Virginia's Warbler         | <i>Oreothlypis virginiae</i>       | Parulidae     | INT          |              |
| Warbling Vireo             | <i>Vireo gilvus</i>                | Vireonidae    | CCW          |              |
| Western Kingbird           | <i>Tyrannus verticalis</i>         | Tyrannidae    | INT          |              |
| Western Tanager            | <i>Piranga ludoviciana</i>         | Cardinalidae  | CCW          |              |
| Western Wood-Pewee         | <i>Contopus sordidulus</i>         | Tyrannidae    | INT          |              |
| White-browed Ground-Tyrant | <i>Muscisaxicola albilora</i>      | Tyrannidae    | INT          |              |
| White-crested Elaenia      | <i>Elaenia albiceps</i>            | Tyrannidae    | CW           |              |
| White-rumped Sandpiper     | <i>Calidris fuscicollis</i>        | Scolopacidae  | CW           | X            |
| Willow Flycatcher          | <i>Empidonax traillii</i>          | Tyrannidae    | CCW          |              |
| Wilson's Phalarope         | <i>Phalaropus tricolor</i>         | Scolopacidae  | INT          | X            |
| Wilson's Warbler           | <i>Cardellina pusilla</i>          | Parulidae     | CW           |              |
| Wood Thrush                | <i>Hylocichla mustelina</i>        | Turdidae      | CW           | X            |
| Worm-eating Warbler        | <i>Helmitheros vermivorum</i>      | Parulidae     | CW           | X            |
| Yellow Warbler             | <i>Setophaga petechia</i>          | Parulidae     | CCW          |              |

| <b>Common</b>             | <b>Scientific</b>             | <b>Family</b> | <b>Class</b> | <b>Ocean</b> |
|---------------------------|-------------------------------|---------------|--------------|--------------|
| Yellow-bellied Flycatcher | <i>Empidonax flaviventris</i> | Tyrannidae    | INT          | X            |
| Yellow-bellied Sapsucker  | <i>Sphyrapicus varius</i>     | Picidae       | INT          |              |
| Yellow-billed Cuckoo      | <i>Coccyzus americanus</i>    | Cuculidae     | CW           | X            |
| Yellow-green Vireo        | <i>Vireo flavoviridis</i>     | Vireonidae    | INT          |              |
| Yellow-rumped Siskin      | <i>Carduelis uropygialis</i>  | Fringillidae  | INT          |              |
| Yellow-throated Vireo     | <i>Vireo flavifrons</i>       | Vireonidae    | CW           | X            |
